# Supplementary material
Source: Springer Nature journal article supplement (https://www.springermedizin.de/resource/supplementary/12990_2007_94_MOESM2_ESM.pdf/9612556)

**Nonsurgical:  $R^2=0.31$  (n=117)**

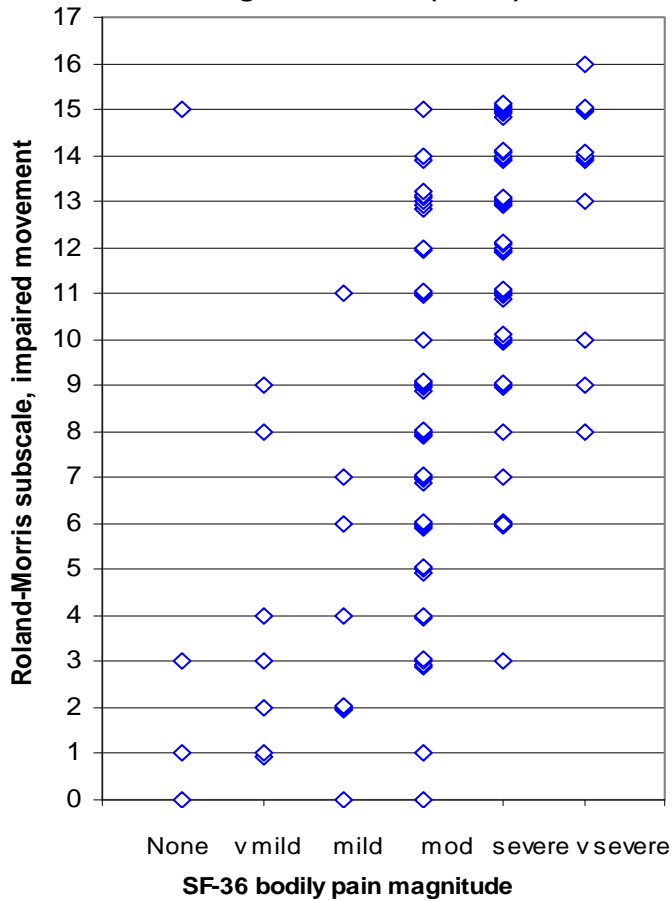

**Surgical:  $R^2=0.16$  (n=176)**

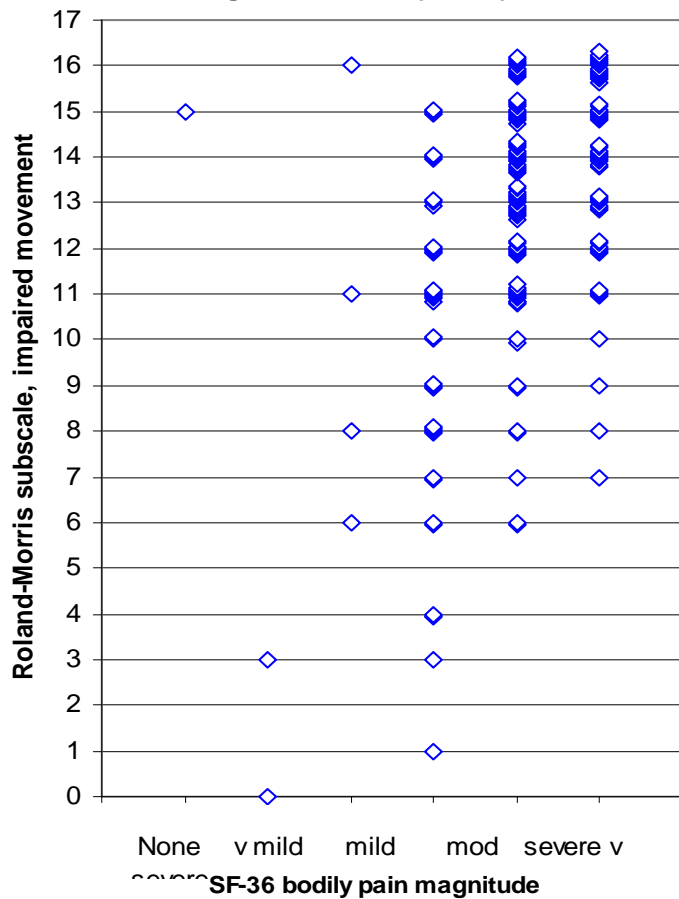

Supplement: MOESM2 [file 9612556]
